# Supplementary material for: The intra-host evolutionary landscape and pathoadaptation of persistent Staphylococcus aureus in chronic rhinosinusitis
Source: PubMed Central journal article supplement (PMC10711304; doi:10.1099/mgen.0.001128), 2023-11-27
Supplement: mgen-9-1128-s001.pdf [file mgen-9-1128-s001.pdf]

Table S1. Biosample accession number for each sample

| <b>Biosample accession</b> | <b>Sample id</b> | <b>Host id and timepoint</b> |
|----------------------------|------------------|------------------------------|
| SAMN32360832               | C22              | 420_T0                       |
| SAMN32360833               | C265             | 1415_T0                      |
| SAMN32360834               | C13              | 1676_T0                      |
| SAMN32360835               | C80              | 1992_T0                      |
| SAMN32360836               | C295             | 2911_T1                      |
| SAMN32360837               | C52              | 3344_T0                      |
| SAMN32360838               | C9               | 3997_T0                      |
| SAMN32360839               | C3               | 4681_T0                      |
| SAMN32360840               | C67              | 4875_T0                      |
| SAMN32360841               | C72              | 5047_T0                      |
| SAMN32360842               | C45              | 5142_T0                      |
| SAMN32360843               | C224             | 5519_T0                      |
| SAMN32360844               | C222             | 5562_T0                      |
| SAMN32360845               | C241             | 5728_T0                      |
| SAMN32360846               | C100             | 276_T0                       |
| SAMN32360847               | C364             | 276_T1                       |
| SAMN32360848               | C320             | 420_T1                       |
| SAMN32360849               | C235             | 539_T0                       |
| SAMN32360850               | C318             | 539_T1                       |
| SAMN32360851               | C148             | 1170_T1                      |
| SAMN32360852               | C79              | 1170_T0                      |
| SAMN32360853               | C324             | 1415_T1                      |
| SAMN32360854               | C76              | 1676_T1                      |
| SAMN32360855               | C208             | 1992_T1                      |
| SAMN32360856               | C240             | 2911_T0                      |
| SAMN32360857               | C113             | 3344_T1                      |
| SAMN32360858               | C195             | 3357_T1                      |
| SAMN32360859               | C24              | 3357_T0                      |
| SAMN32360860               | C353             | 3997_T1                      |
| SAMN32360861               | C121             | 4009_T0                      |
| SAMN32360862               | C255             | 4009_T1                      |
| SAMN32360863               | C56              | 4681_T1                      |
| SAMN32360864               | C188             | 4747_T1                      |
| SAMN32360865               | C32              | 4747_T0                      |
| SAMN32360866               | C16              | 4784_T0                      |
| SAMN32360867               | C70              | 4784_T1                      |
| SAMN32360868               | C294             | 4875_T1                      |

|                     |      |         |
|---------------------|------|---------|
| <b>SAMN32360869</b> | C21  | 4986_T0 |
| <b>SAMN32360870</b> | C273 | 4986_T1 |
| <b>SAMN32360871</b> | C351 | 5047_T1 |
| <b>SAMN32360872</b> | C133 | 5060_T0 |
| <b>SAMN32360873</b> | C179 | 5060_T1 |
| <b>SAMN32360874</b> | C149 | 5142_T1 |
| <b>SAMN32360875</b> | C209 | 5308_T1 |
| <b>SAMN32360876</b> | C91  | 5308_T0 |
| <b>SAMN32360877</b> | C206 | 5328_T0 |
| <b>SAMN32360878</b> | C276 | 5328_T1 |
| <b>SAMN32360879</b> | C136 | 5390_T0 |
| <b>SAMN32360880</b> | C197 | 5390_T1 |
| <b>SAMN32360881</b> | C155 | 5448_T0 |
| <b>SAMN32360882</b> | C339 | 5448_T1 |
| <b>SAMN32360883</b> | C196 | 5469_T0 |
| <b>SAMN32360884</b> | C342 | 5469_T1 |
| <b>SAMN32360885</b> | C183 | 5485_T0 |
| <b>SAMN32360886</b> | C312 | 5485_T1 |
| <b>SAMN32360887</b> | C182 | 5503_T0 |
| <b>SAMN32360888</b> | C233 | 5503_T1 |
| <b>SAMN32360889</b> | C349 | 5519_T1 |
| <b>SAMN32360890</b> | C333 | 5562_T1 |
| <b>SAMN32360891</b> | C245 | 5631_T0 |
| <b>SAMN32360892</b> | C314 | 5631_T1 |
| <b>SAMN32360893</b> | C285 | 5647_T0 |
| <b>SAMN32360894</b> | C355 | 5647_T1 |
| <b>SAMN32360895</b> | C309 | 5728_T1 |
| <b>SAMN32360896</b> | C325 | 5767_T0 |
| <b>SAMN32360897</b> | C363 | 5767_T1 |
| <b>SAMN32360898</b> | C311 | 5911_T0 |
| <b>SAMN32360899</b> | C357 | 5911_T1 |

Table S2. MSCRAMM genes

| Gene (Panaroo Cluster)                 | No. isolates with gene | Mean size gene (nucleotide) |
|----------------------------------------|------------------------|-----------------------------|
| <i>isdB</i>                            | 68                     | 1941.62                     |
| <i>clfB</i>                            | 68                     | 2668.54                     |
| <i>mscL</i>                            | 68                     | 366                         |
| <i>isdF</i>                            | 68                     | 969                         |
| <i>isdD</i>                            | 68                     | 1077                        |
| <i>isdE</i>                            | 68                     | 879                         |
| <i>ebhB</i> ~ <i>ebh</i> ~ <i>ebhA</i> | 68                     | 17749.25                    |
| <i>efb</i>                             | 68                     | 470.65                      |
| <i>isdA</i>                            | 68                     | 1057.63                     |
| <i>sdrC</i>                            | 68                     | 2838.70                     |
| <i>clfA</i>                            | 68                     | 2861.82                     |
| <i>isdC</i>                            | 68                     | 684.88                      |
| <i>eap</i>                             | 68                     | 1372.21                     |
| <i>fnbA</i>                            | 66                     | 2933                        |
| <i>sdrD</i> ~ <i>clfA</i>              | 56                     | 4095.63                     |
| <i>sdrE</i>                            | 55                     | 3444.82                     |
| <i>fnbB</i>                            | 49                     | 2863.84                     |
| <i>cna</i>                             | 42                     | 3002.07                     |
| <i>sasG</i>                            | 29                     | 2575.62                     |

Table S3. Metadata characteristics of chronic rhinosinusitis subjects and corresponding clinical isolate collection

| Characteristic                                                       | CRSwNP           | CRSsNP           | Total            |
|----------------------------------------------------------------------|------------------|------------------|------------------|
| Host subjects-N                                                      | 29               | 5                | 34               |
| Gender male-N                                                        | 12               | 2                | 14               |
| Age -year ( $\pm$ SD)                                                | 51 ( $\pm$ 11)   | 54 ( $\pm$ 21)   | 52 ( $\pm$ 15)   |
| Aspirin sensitivity-N                                                | 6                | 0                | 6                |
| Asthmatic-N                                                          | 17               | 2                | 19               |
| Mean time between clinical isolate pair collection- days ( $\pm$ SD) | 565 ( $\pm$ 398) | 558 ( $\pm$ 362) | 563 ( $\pm$ 387) |

CRSwNP, chronic rhinosinusitis with nasal polyps, CRSsNP, chronic rhinosinusitis without nasal polyps.

Table S4. Compilation of metadata characteristics of clinical isolate by relatedness classification and host characteristics

| Characteristic                                                       | Same strain pairs | Different strain pairs | Total           |
|----------------------------------------------------------------------|-------------------|------------------------|-----------------|
| Count-N (% of total)                                                 | 14 (41%)          | 20 (59%)               | 34 (100%)       |
| Gender of host-Male-N                                                | 5                 | 9                      | 14              |
| Age of host-year ( $\pm$ SD)                                         | 57 ( $\pm$ 15)    | 50 ( $\pm$ 16)         | 52 ( $\pm$ 15)  |
| Phenotype of host-CRSwNP- N                                          | 14                | 15                     | 29              |
| Aspirin sensitivity of host-N                                        | 3                 | 3                      | 6               |
| Asthma status of host-N                                              | 7                 | 12                     | 19              |
| Mean time between clinical isolate pair collection- days ( $\pm$ SD) | 629 ( $\pm$ 474)  | 518 ( $\pm$ 320)       | 563( $\pm$ 387) |

CRSwNP, chronic rhinosinusitis with nasal polyps.



Table S5. Frequency distribution of *Staphylococcus aureus* isolates' Minimum Inhibitory Concentration (MIC)

| Antibiotic     | Timepoint * | MIC (%)              |      |       |       |       |       |       |       |       |      |      |       | MIC <sub>50</sub> | MIC <sub>90</sub> | Resistant (%) |
|----------------|-------------|----------------------|------|-------|-------|-------|-------|-------|-------|-------|------|------|-------|-------------------|-------------------|---------------|
|                |             | Concentration (mg/L) |      |       |       |       |       |       |       |       |      |      |       |                   |                   |               |
|                |             | <0.06                | 0.06 | 0.125 | 0.25  | 0.5   | 1     | 2     | 4     | 8     | 16   | 32   | >32   |                   |                   |               |
| Erythromycin   | T0          | 0.00                 | 0.00 | 0.00  | 0.00  | 0.00  | 14.71 | 47.06 | 17.65 | 5.88  | 5.88 | 2.94 | 5.88  | 2                 | >32               | 21            |
|                | T1          | 0.00                 | 0.00 | 0.00  | 0.00  | 0.00  | 2.94  | 38.24 | 26.47 | 14.71 | 2.94 | 5.88 | 8.82  | 4                 | >32               | 32            |
| Doxycycline    | T0          | 0.00                 | 2.94 | 26.47 | 52.94 | 8.82  | 5.88  | 0.00  | 2.94  | 0.00  | 0.00 | 0.00 | 0.00  | 0.25              | 0.50              | 0             |
|                | T1          | 0.00                 | 0.00 | 5.88  | 29.41 | 47.06 | 5.88  | 2.94  | 5.88  | 0.00  | 2.94 | 0.00 | 0.00  | 0.50              | 2                 | 3             |
| Clindamycin    | T0          | 0.00                 | 0.00 | 2.94  | 52.94 | 35.29 | 5.88  | 0.00  | 0.00  | 0.00  | 0.00 | 0.00 | 2.94  | 0.25              | 0.50              | 3             |
|                | T1          | 0.00                 | 0.00 | 0.00  | 23.53 | 58.82 | 5.88  | 0.00  | 0.00  | 0.00  | 0.00 | 0.00 | 11.76 | 0.50              | 2                 | 12            |
| Augmentin      | T0          | 0.00                 | 0.00 | 0.00  | 5.88  | 14.71 | 38.24 | 32.35 | 2.94  | 0.00  | 5.88 | 0.00 | 0.00  | 4                 | 8                 | N. A          |
|                | T1          | 0.00                 | 0.00 | 0.00  | 2.94  | 8.82  | 23.53 | 29.41 | 11.76 | 5.88  | 5.88 | 8.82 | 2.94  | 4                 | 16                | N. A          |
| Gentamycin     | T0          | 0.00                 | 0.00 | 0.00  | 2.94  | 17.65 | 29.41 | 35.29 | 2.94  | 5.88  | 2.94 | 0.00 | 2.94  | 4                 | 16                | 6             |
|                | T1          | 0.00                 | 0.00 | 0.00  | 0.00  | 2.94  | 11.76 | 41.18 | 14.71 | 11.76 | 5.88 | 2.94 | 8.82  | 4                 | 16                | 18            |
| Mupirocin      | T0          | 85.29                | 2.94 | 8.82  | 0.00  | 0.00  | 0.00  | 0.00  | 0.00  | 0.00  | 2.94 | 0.00 | 0.00  | <0.06             | 0.125             | N. A          |
|                | T1          | 67.65                | 0.00 | 29.41 | 2.94  | 0.00  | 0.00  | 0.00  | 0.00  | 0.00  | 0.00 | 0.00 | 0.00  | <0.06             | 0.125             | N. A          |
| Clarithromycin | T0          | 0.00                 | 0.00 | 0.00  | 0.00  | 0.00  | 8.82  | 58.82 | 14.71 | 0.00  | 5.88 | 2.94 | 8.82  | 2                 | 32                | 18            |
|                | T1          | 2.94                 | 0.00 | 0.00  | 0.00  | 0.00  | 14.71 | 32.35 | 23.53 | 5.88  | 2.94 | 2.94 | 14.71 | 2                 | >32               | 26            |

\*T0 and T1 represent the first and second clinical isolate of the longitudinal *S. aureus* pairs. The light-grey fill represents the intermediate susceptible range, and the dark-grey fill represents the resistant range. MIC50 and MIC90 is the minimum inhibitory concentration

(mg/L) that inhibited 50 and 90% of the isolates, respectively. Antibiotics without shading have no interpretive MIC breakpoint accessible.

Figure S1

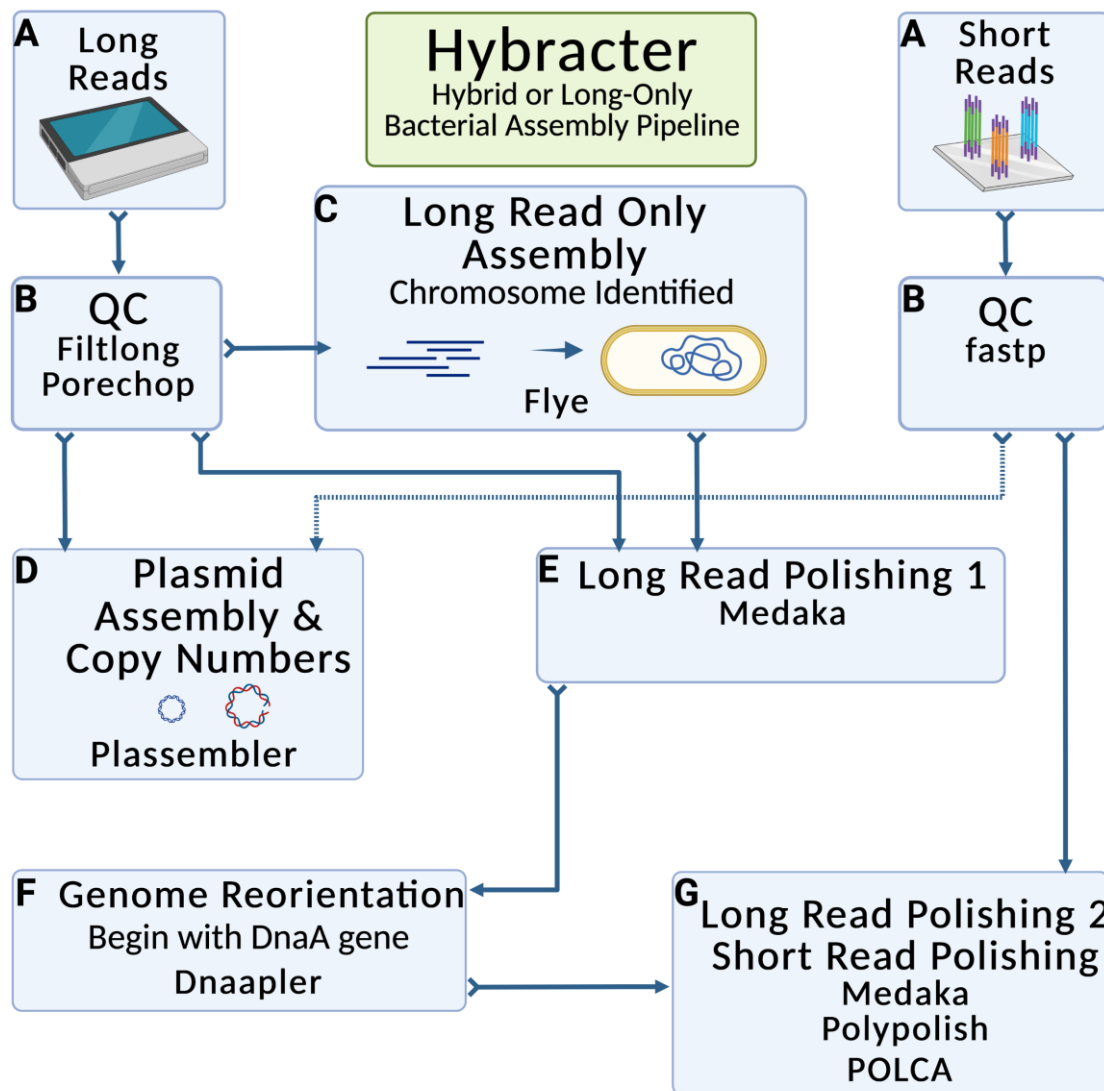

Figure S1 Hybracter workflow. (A) ONT long-reads and paired-end short-reads are specified as input. (B) Long reads are filtered and adapters are trimmed with Filtlong and Porechop. Short reads are filtered and trimmed using fastp. (C) Long-read assembly is conducted using Flye. The bacterial chromosome is identified and extracted for polishing. (D) Plasmids are assembled using a hybrid short-read first method with Plassembler, which also infers the plasmid copy number. (E) The first round of long-read polishing is conducted on the chromosome using Medaka. (F) The chromosome sequence is reoriented, to begin with the dnaA gene with Dnaapler. (G) A second round



of long-read polishing is conducted with Medaka, followed by short-read polishing with Polypolish and POLCA.

Figure S2

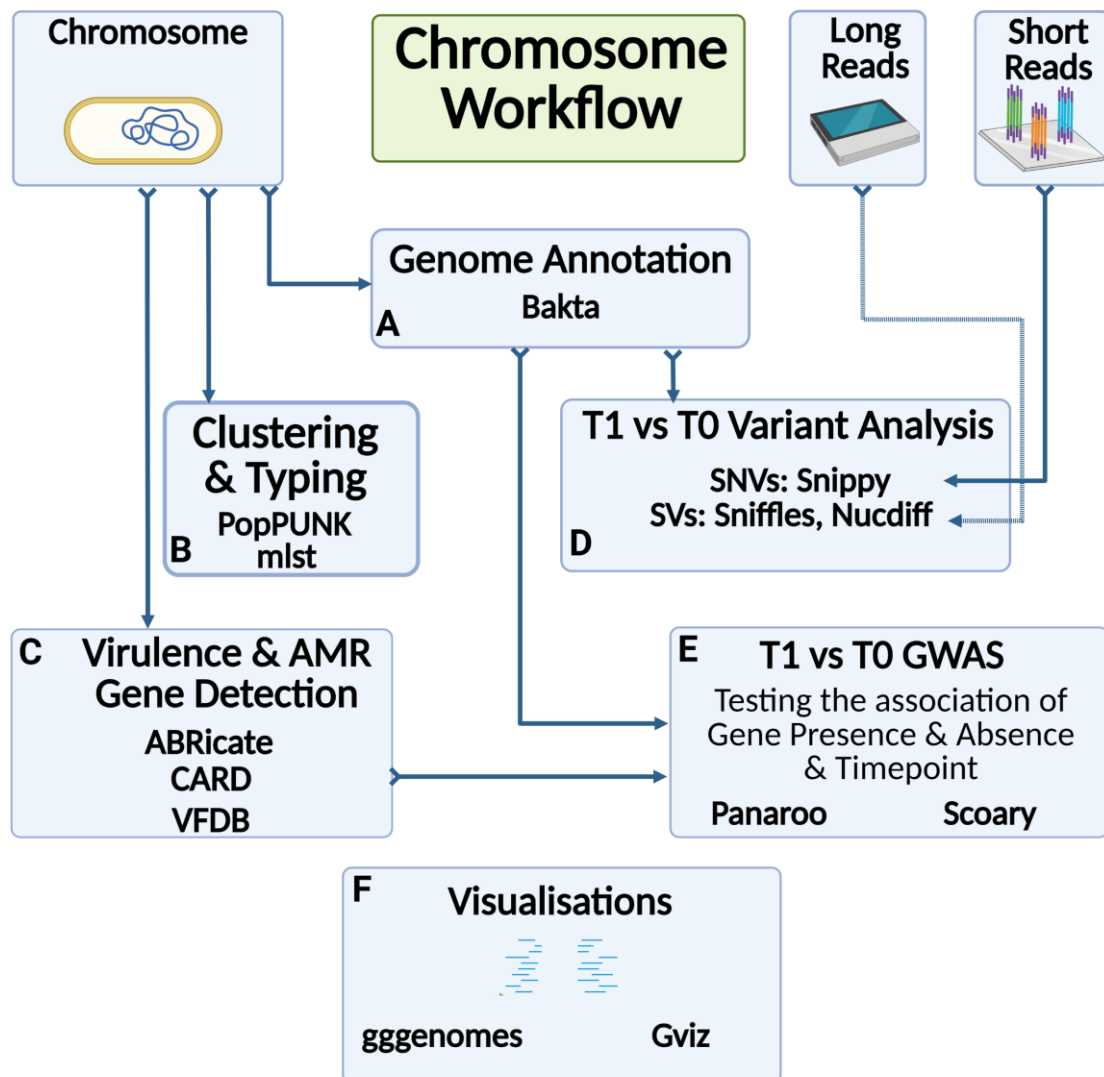

Figure S2 Chromosome analysis workflow. (A) Chromosome genomes annotated with Bakta. (B) Isolates assigned to Variable-length k-mer clusters with PopPUNK and multi-locus sequence types with mlst. (C) Virulence and antimicrobial resistance genes were identified using ABRicate with the VFDB and CARD databases. (D) Small nucleotide identified with short-reads using Snippy. Structural variants were identified using long reads using Sniffles and using the chromosome assemblies using Nucdiff. Gene-wide association study analysis between T0 and T1 isolates was conducted using Panaroo to

create the pangenome and Scoary to test for significance. (F) Visualisations were conducted with gggenomes and Gviz.

Figure S3

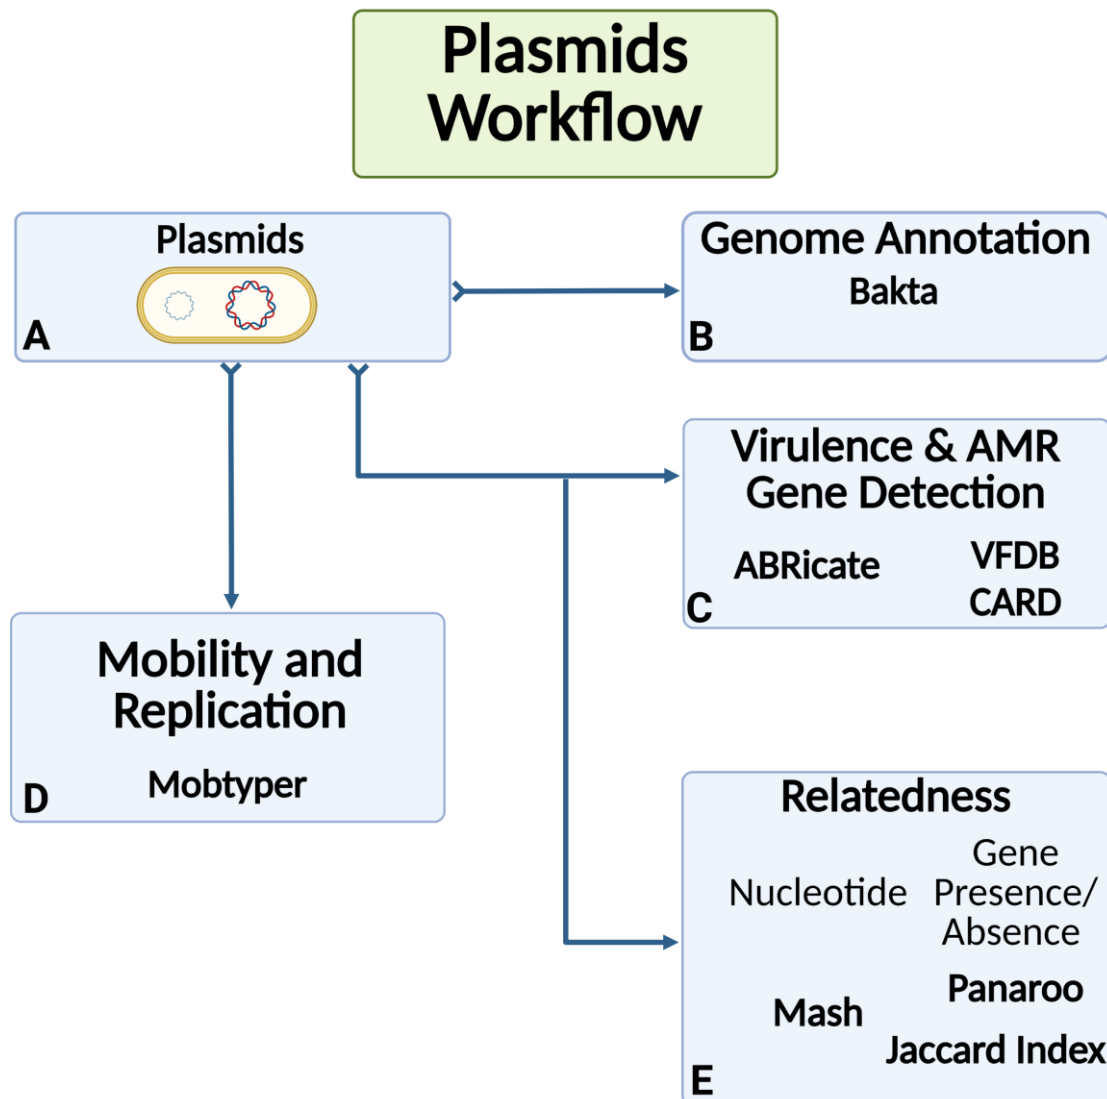

Figure S3 Plasmid analysis workflow. (A) Plasmid assembles from Plassembler as used as input (B) Plasmids are genomically annotated with Bakta. (C) Virulence and antimicrobial resistance genes were identified using ABRicate with the VFDB and CARD databases. (D) Plasmid mobilisation potential is predicted using Mob-Typer to identify potential replicons and relaxases. (E) The relatedness of all plasmids is analysed at the overall nucleotide level by calculating pairwise mash distances between all plasmids, and at the gene presence/absence level by calculating the Jaccard Index of shared genes for each pair of plasmids.

Figure S4

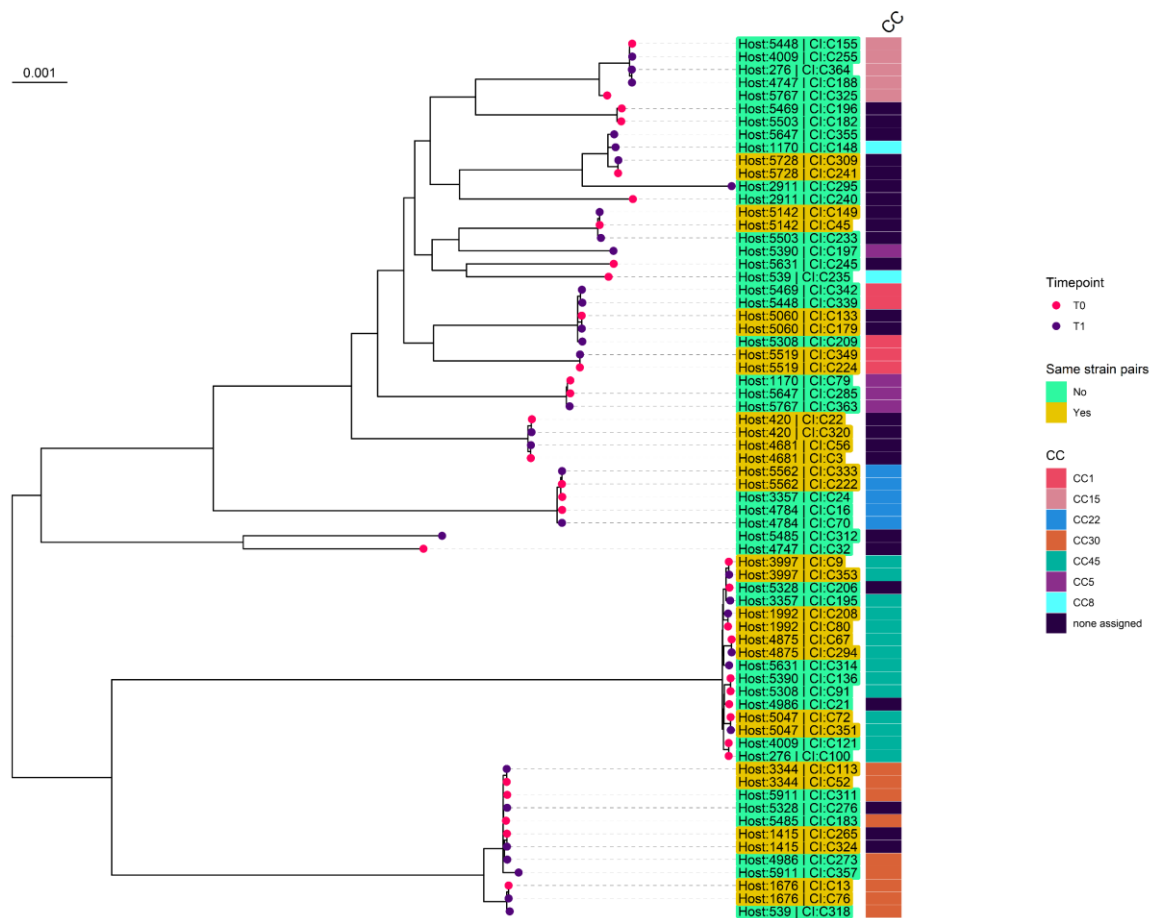

Figure S4 Maximum-likelihood phylogenetic tree depicting the evolutionary relationships among 68 isolates based on core gene alignment. The tree was constructed using the IQ-TREE algorithm with the GTR model and free rate. The X-axis represents nucleotide divergence calculated using uncorrected pair-wise distances. Branch tip colours correspond to the collection timepoints (T0=first, T1=later timepoint), while the right-side colour bar indicates the clonal complex (CC). Branch labels indicate the host ID, and the branch tips are color-coded to indicate the classification of the same or different strain pairs based on the clinical isolate number.

Figure S5

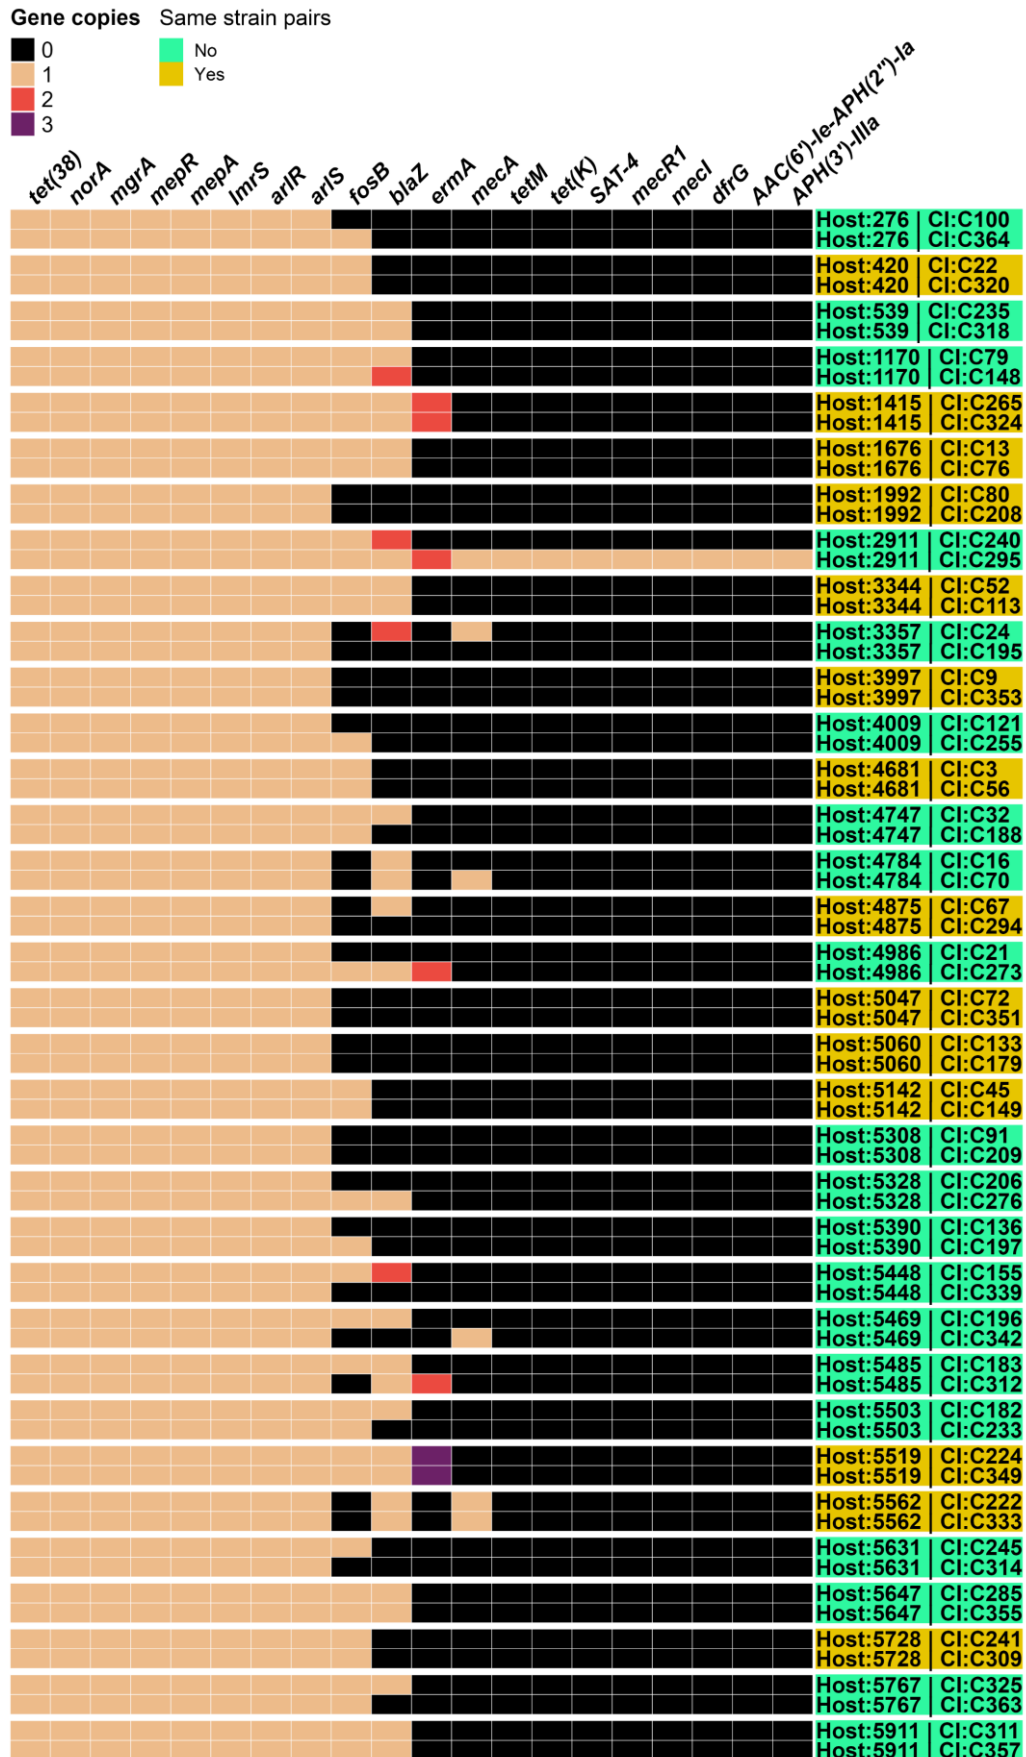

Figure S5 Gene copy matrix of antimicrobial resistance genes in the genomes of all *S. aureus* clinical isolates (n=68). The isolates are represented by the rows and grouped by pairs and the order of clinical isolate collection. The gene copies of antimicrobial resistance genes are indicated by colour. Labels show the corresponding host ID and the clinical isolate number colour coded with same or different strain pair classification.





Figure S7

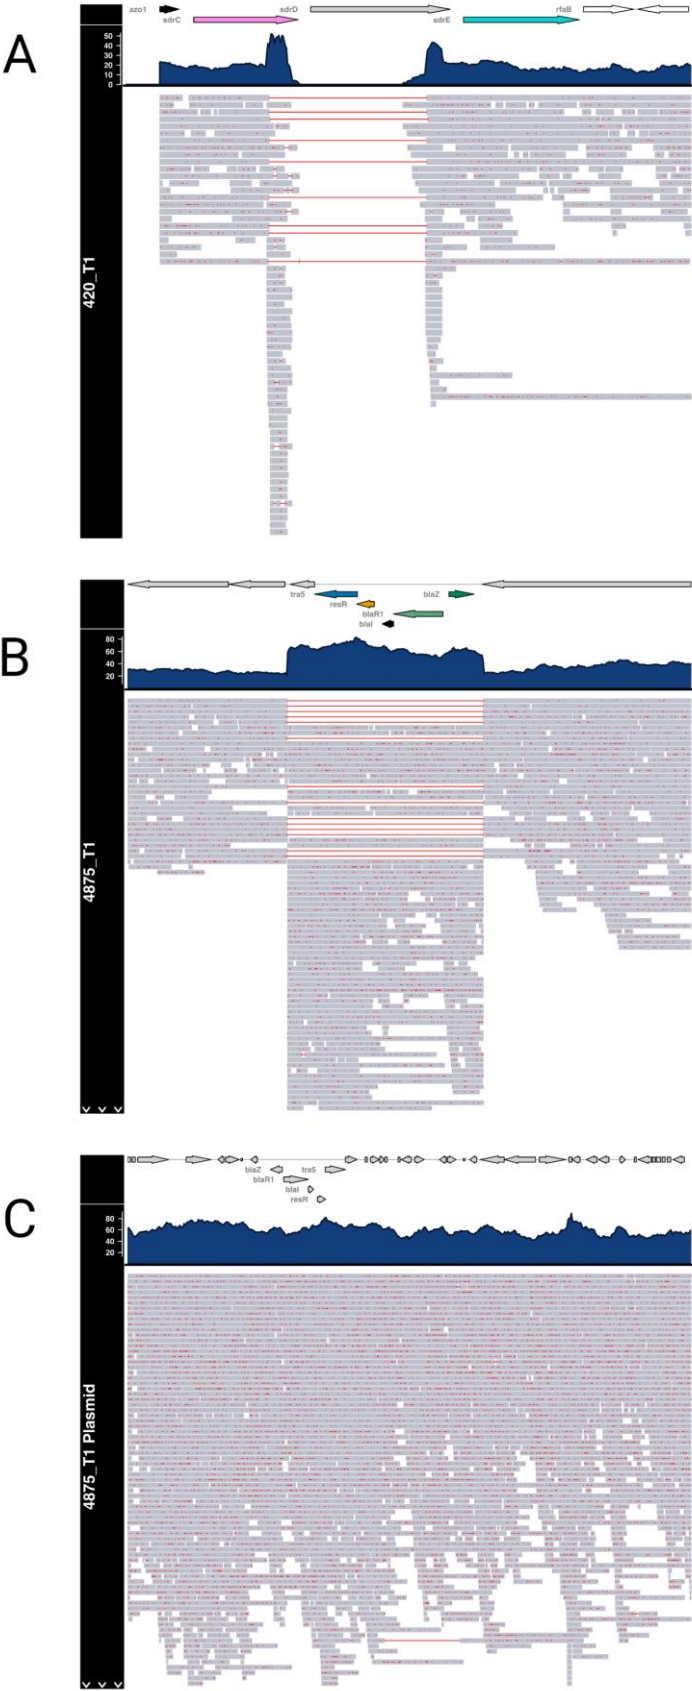

Figure S7 Coverage and pile-up plot of aligned long-reads (A) The second timepoint isolate of host 420 against the *sdrCDE* locus of the first timepoint isolate, red indicates deleted regions in the reads. (B) The second timepoint isolate of host 4875 against the  $\beta$ -*lactamase* locus of the first timepoint isolate, red indicates deleted regions in the reads. (C) The acquired plasmid of the second timepoint isolate of host 4875, red indicates deleted regions in the reads.

Figure S8

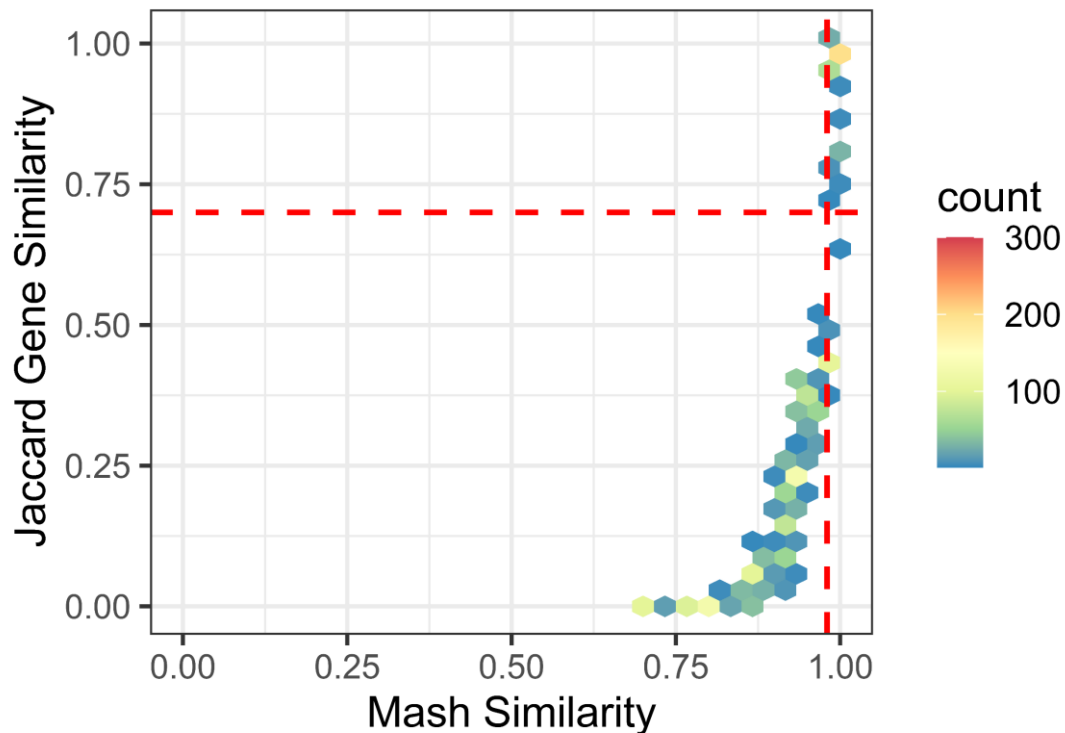

Figure S8 Hexagonal binned plot displaying the relationship between all the plasmids detected based on gene presence and absence and M similarity (n=2,756). The hexagonal cell colour represents the number of data points observed in that cell. Plasmids were considered the same using a threshold of Mash similarity distance greater than 0.98 and Jaccard index of gene presence and absence greater than 0.7.

Figure S9

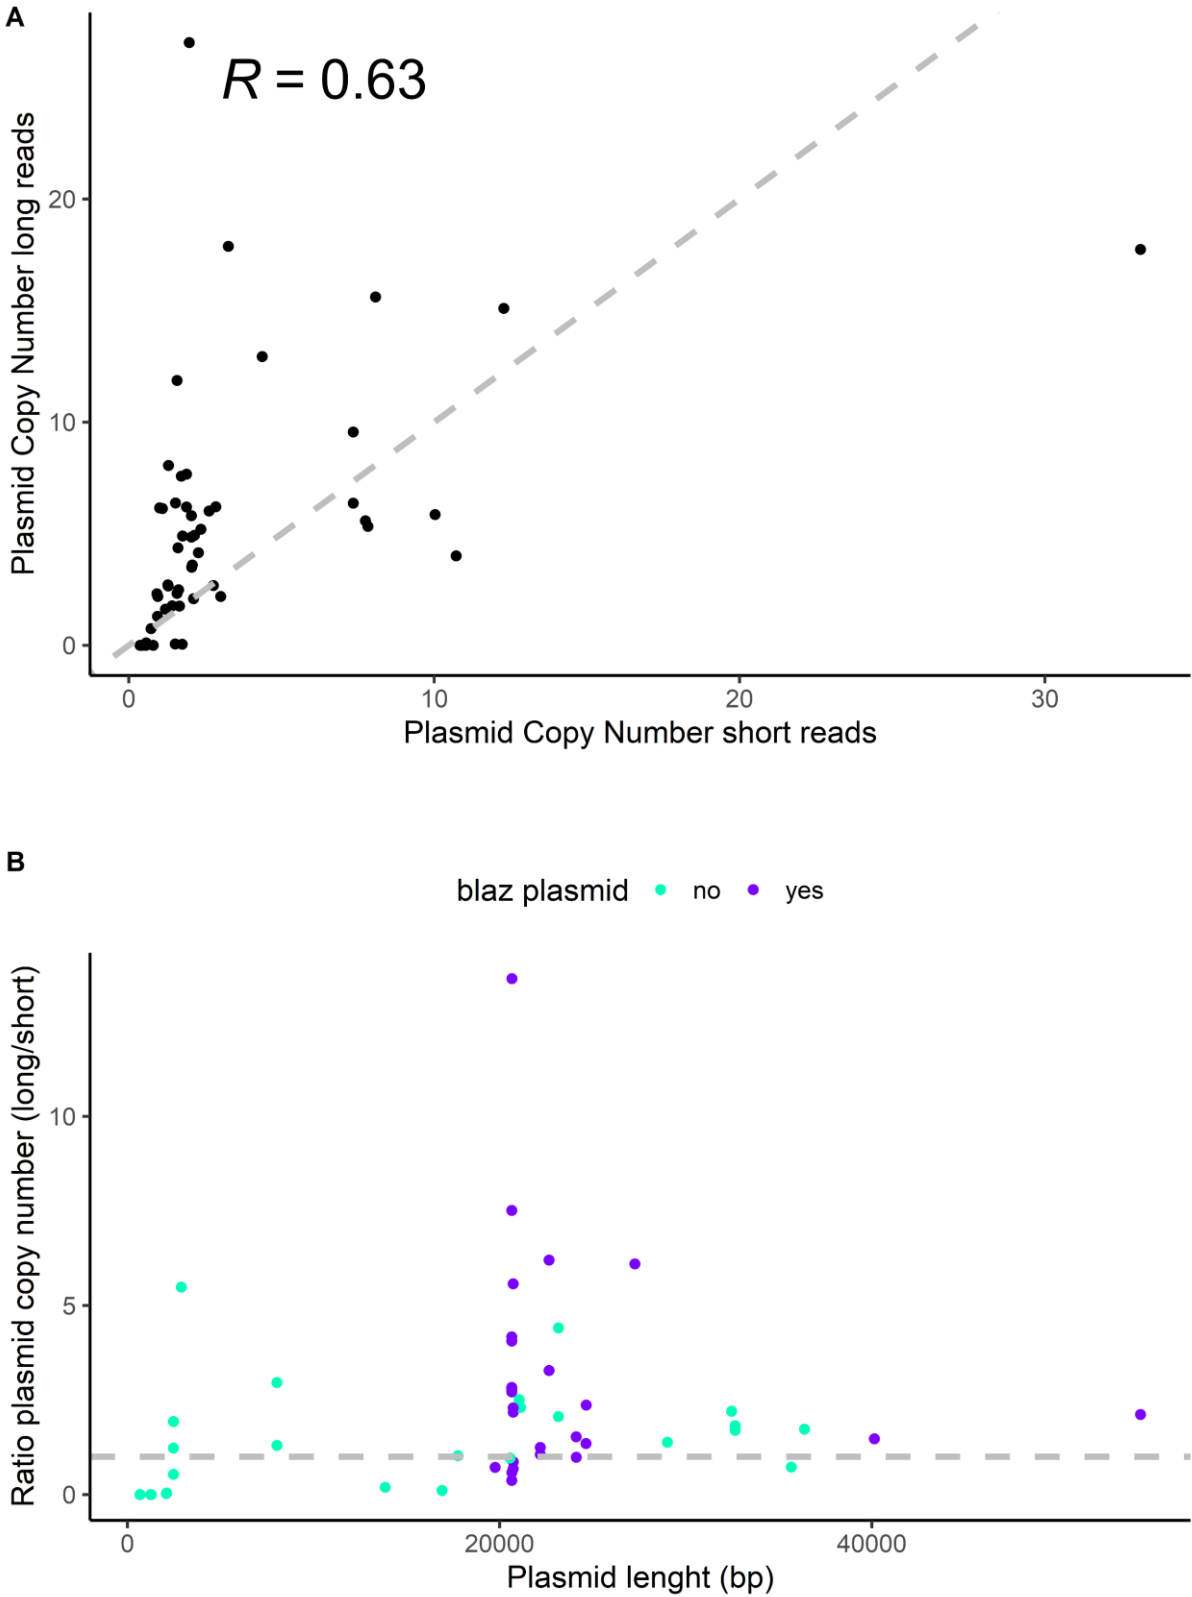

Figure S9 Comparison of plasmid copy numbers estimated from long-read sequencing versus short-read sequencing. (A) Each point represents a single plasmid (n=53), with

the x-axis indicating the copy number from short-read sequencing and the y-axis indicating the copy number from long-read sequencing. The Spearman correlation coefficient is shown in the top left. (B) The ratio of the plasmid copy number (short/long) for all plasmids detected (N=53). *Blaz*-positive plasmids are indicated by colour. The grey line is the intercept of the ratio=1.

Figure S10

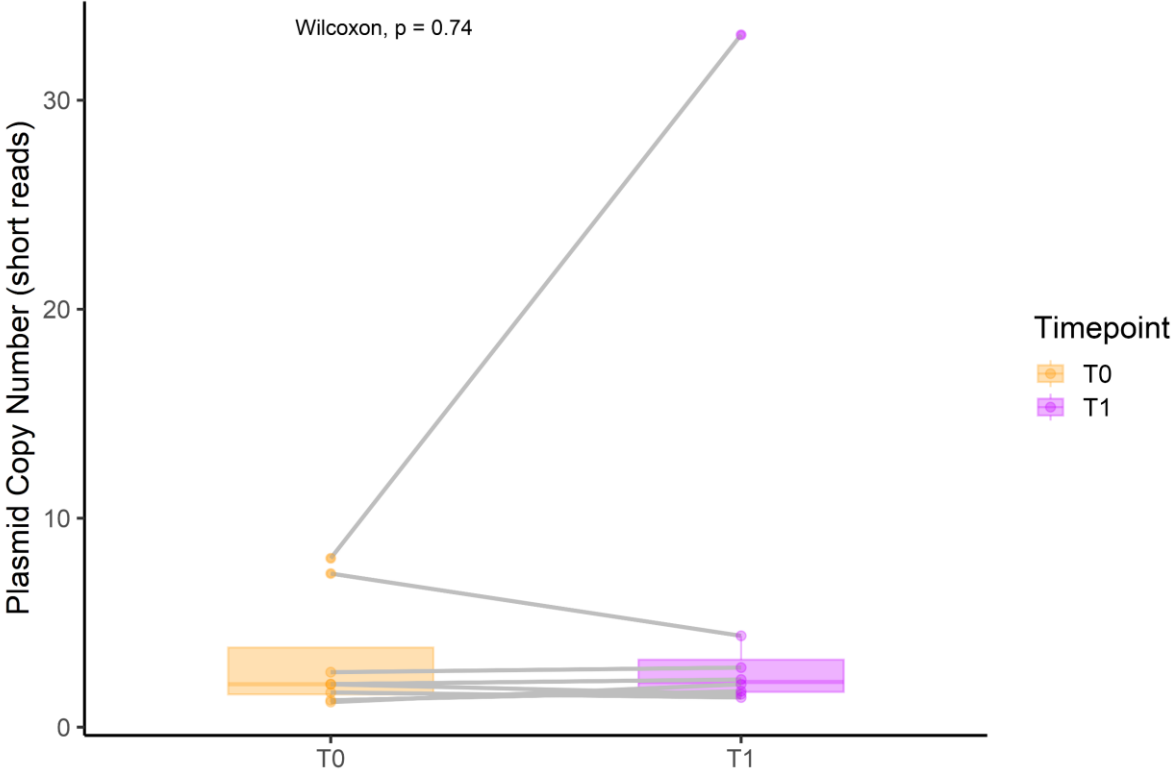

Figure S10 Copy numbers of the conserved plasmids in the 'same strain' group (n=8) for short-read dataset. The colour indicates timepoints, and the grey line indicates paired conserved plasmids. The Wilcoxon signed-rank test compared the copy numbers between the two timepoints, with  $p < 0.05$  considered significant.

**Figure S11**

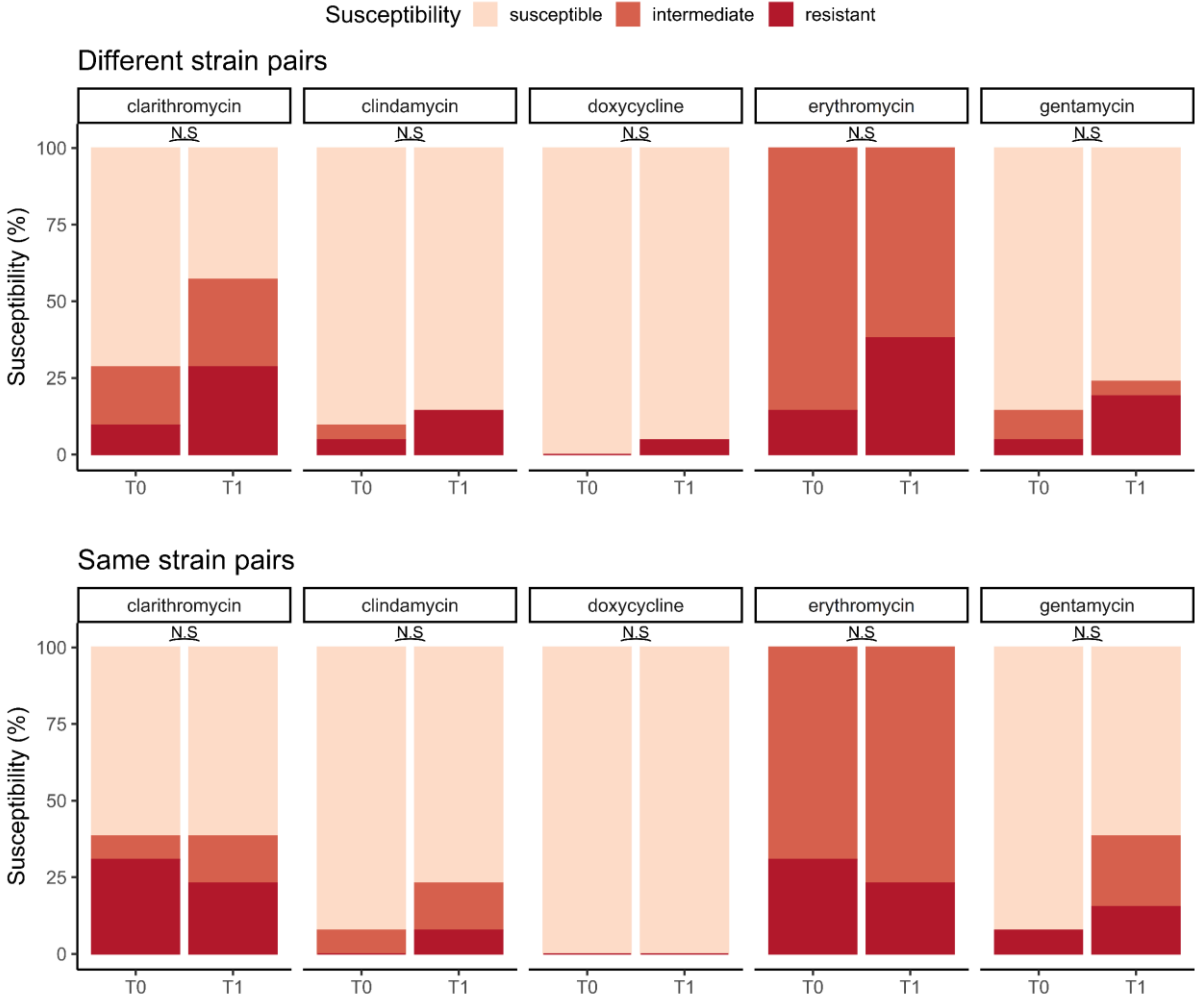

Figure S11 Planktonic antibiotic susceptibility of *S. aureus* isolates (n=68). Antibiotic susceptibility of *S. aureus* isolates is presented based on minimum inhibitory concentration (MIC) breakpoints adapted from the CLSI for isolates classified as the same and different strains (N=14, N=20). Fisher's exact test was used to determine the significant difference in the proportion of resistant and non-resistant isolates between the T0 and T1 groups, with a threshold of  $p < 0.05$ . MIC breakpoints are not available for augmentin and mupirocin.

Figure S12

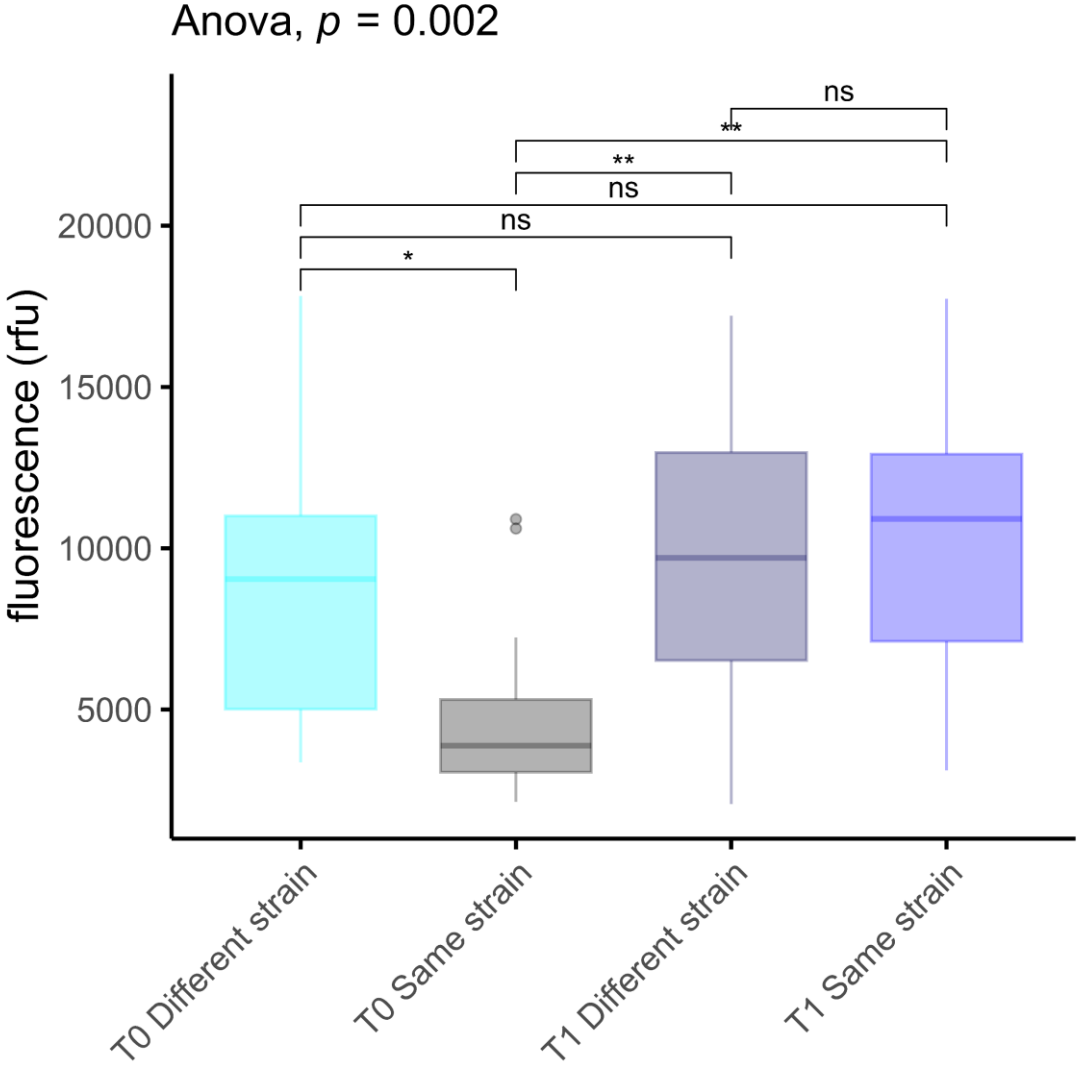

Figure S 12 *S. aureus* biofilms viability after 48 hours of growth for all 68 clinical isolates. The x-axis indicates the first and second clinical isolates classified as the 'same strain' and 'different strain'. Significance was tested using ANOVA, and post-hoc pairwise t-test with Bonferroni correction applied for multiple comparisons.

Figure S13

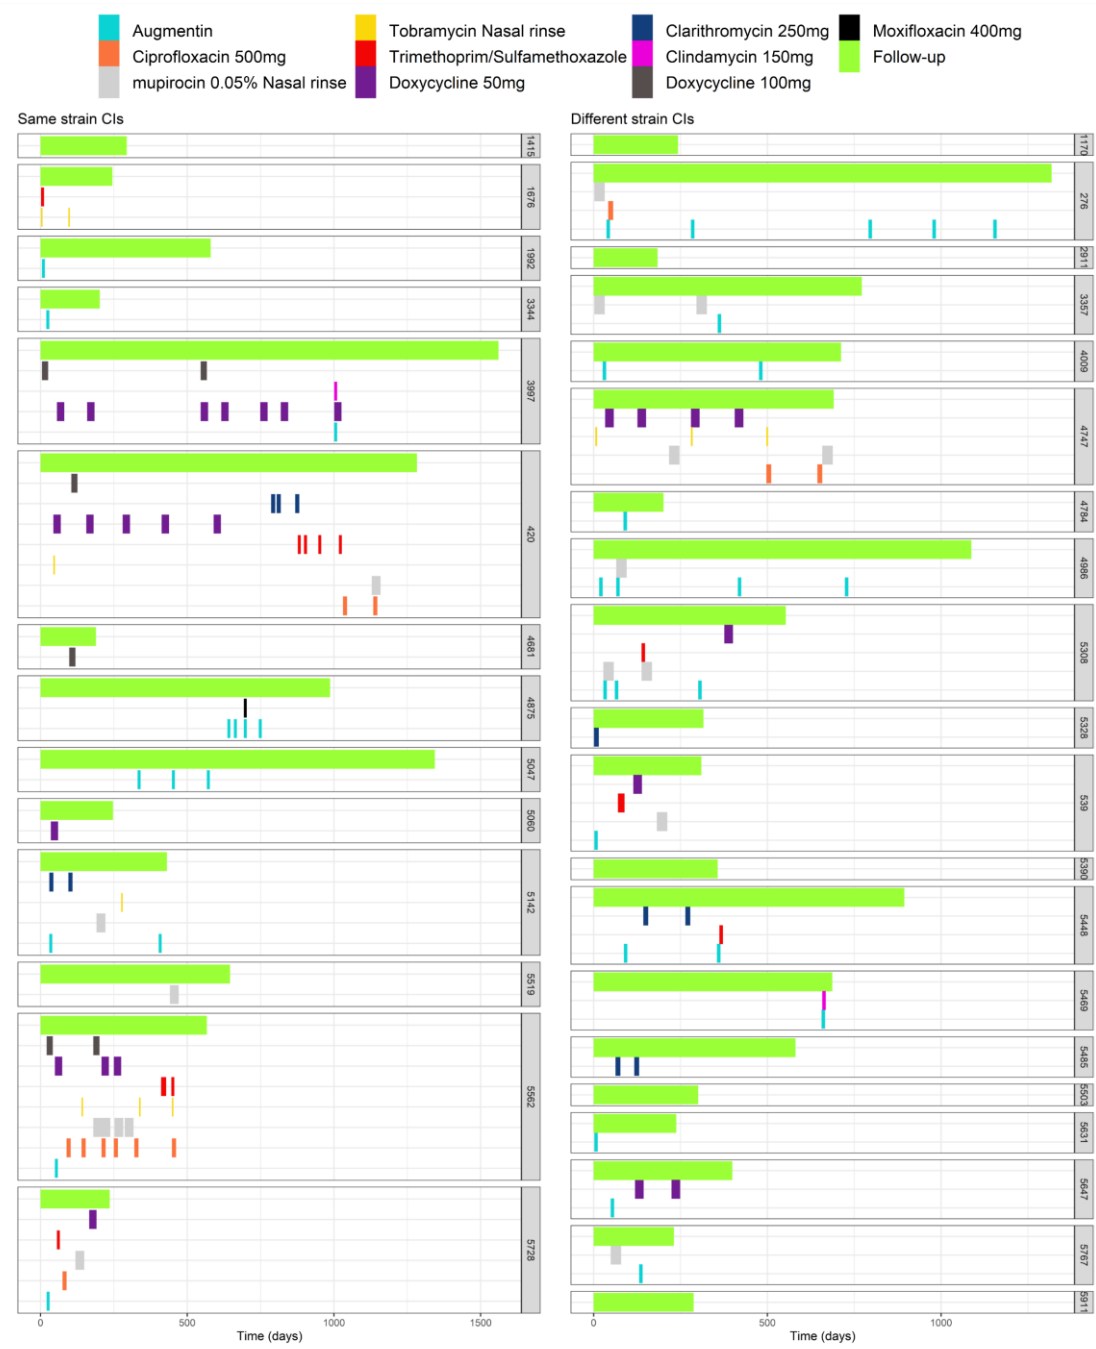

Figure S13 Swimmer plot showing the timeline of antibiotic prescription for each subject between the collection of the first and second timepoint isolates. The antibiotics are indicated by colour. The top green bar represents the time between isolate collection. The left column represents all 'same strain' isolates, and the right column represents 'different strain' isolates. Host ID numbers are indicated on the right side of the columns.



## **Supplementary text**

### **ST1**

Chronic rhinosinusitis (CRS) diagnosis criteria as described by the EPOS:

The presence of two or more symptoms, one of which should be either nasal blockage or nasal discharge with facial pain/pressure or loss of smell. The symptoms should last for more than 12 weeks. Patients were considered difficult-to-treat if no acceptable level of control was achieved despite adequate surgery, intranasal corticosteroid treatment and short courses of antibiotics or systemic corticosteroids in the preceding year of collection.

Asthma status and aspirin sensitivity were collected via self-reported questionnaires at the time of consent for the biobank. Furthermore, an ENT surgeon added the CRS subtype to the biobank after endoscopic assessment.
